# Supplementary material for: PPARalpha-mediated effects of dietary lipids on intestinal barrier gene expression
Source: PubMed Central journal article supplement (PMC2408604; doi:10.1186/1471-2164-9-231), 2008-05-19
Supplement: 1471-2164-9-231-S1.pdf [file 1471-2164-9-231-S1.pdf]

**Additional data, table 1:  
PPAR $\alpha$ -dependently regulated barrier genes after acute treatment (6hr) with  
WY14643**

| Gene symbol | Probe set ID | FC<br>acute | P-value<br>acute | Average<br>WT | Average<br>KO |
|-------------|--------------|-------------|------------------|---------------|---------------|
| Slc16a13    | 1453056_at   | 10.7        | 5.9E-07          | 8.2           | 4.7           |
| Slc22a5     | 1440536_at   | 8.3         | 5.1E-08          | 7.9           | 4.9           |
| Slc22a5     | 1421848_at   | 7.7         | 1.6E-07          | 10.0          | 7.0           |
| Slc25a20    | 1423109_s_at | 6.8         | 1.8E-09          | 11.2          | 8.4           |
| Slc22a3     | 1420444_at   | 5.8         | 5.1E-07          | 5.5           | 3.0           |
| Slc25a20    | 1423108_at   | 5.6         | 3.4E-08          | 11.6          | 9.1           |
| Slc25a30    | 1420836_at   | 5.5         | 8.1E-06          | 7.1           | 4.6           |
| Slc22a5     | 1450395_at   | 4.7         | 3.2E-07          | 11.8          | 9.6           |
| Slc25a30    | 1420835_at   | 4.2         | 2.4E-05          | 5.9           | 3.8           |
| Slc25a30    | 1450018_s_at | 3.4         | 2.9E-05          | 5.3           | 3.5           |
| Slc27a2     | 1416316_at   | 2.2         | 8.2E-06          | 12.1          | 11.0          |
| Slc25a4     | 1455069_x_at | 2.1         | 1.4E-06          | 10.1          | 9.0           |
| Slc25a4     | 1434897_a_at | 2.0         | 1.4E-06          | 10.4          | 9.4           |
| Slc25a4     | 1424562_a_at | 1.9         | 9.9E-07          | 10.5          | 9.6           |
| Slc5a6      | 1435860_at   | 1.8         | 1.7E-04          | 6.2           | 5.3           |
| Slc27a4     | 1424441_at   | 1.7         | 1.5E-04          | 10.6          | 9.8           |
| Slc25a10    | 1416954_at   | 1.6         | 7.0E-05          | 9.4           | 8.7           |
| Slc16a1     | 1415802_at   | 1.5         | 3.7E-03          | 10.0          | 9.4           |
| Slc7a7      | 1447181_s_at | 1.5         | 3.4E-03          | 9.6           | 9.0           |
| Slc35f5     | 1452059_at   | 1.4         | 7.6E-04          | 9.8           | 9.3           |
| Slc23a2     | 1445589_at   | 1.4         | 4.9E-04          | 6.6           | 6.2           |
| Slc7a7      | 1417392_a_at | 1.3         | 4.0E-04          | 11.1          | 10.7          |
| Slc25a11    | 1426586_at   | 1.2         | 8.4E-03          | 10.0          | 9.7           |
| Slc4a4      | 1434096_at   | -1.3        | 4.8E-03          | 9.0           | 9.3           |
| Slc5a1      | 1419057_at   | -1.3        | 3.0E-03          | 12.9          | 13.3          |
| Slc44a4     | 1416596_at   | -1.3        | 4.7E-03          | 9.8           | 10.2          |
| Slc25a12    | 1428440_at   | -1.3        | 2.1E-03          | 7.6           | 8.0           |
| Slc19a1     | 1420138_at   | -1.3        | 2.3E-03          | 8.0           | 8.4           |
| Slc35d2     | 1453300_at   | -1.3        | 4.0E-03          | 6.8           | 7.2           |
| Slc46a1     | 1426715_s_at | -1.3        | 5.9E-04          | 10.8          | 11.3          |
| Slc46a1     | 1426714_at   | -1.3        | 9.8E-04          | 10.8          | 11.2          |
| Slco2b1     | 1433933_s_at | -1.3        | 6.3E-04          | 7.9           | 8.3           |
| Slc30a1     | 1436164_at   | -1.3        | 8.9E-03          | 7.8           | 8.3           |
| Slc17a5     | 1429116_at   | -1.4        | 2.7E-03          | 6.9           | 7.4           |
| Slc19a2     | 1441315_s_at | -1.4        | 5.5E-04          | 7.5           | 8.0           |
| Slc39a14    | 1427035_at   | -1.4        | 4.6E-03          | 9.5           | 9.9           |
| Slc12a6     | 1449878_a_at | -1.4        | 4.1E-03          | 8.5           | 8.9           |
| Slc6a4      | 1417150_at   | -1.4        | 2.0E-03          | 9.6           | 10.1          |
| Slc5a1      | 1455431_at   | -1.4        | 5.1E-04          | 13.0          | 13.5          |
| Slc2a2      | 1449067_at   | -1.4        | 2.2E-03          | 11.4          | 11.9          |
| Slc1a1      | 1448299_at   | -1.4        | 4.0E-03          | 7.6           | 8.1           |
| Slc6a7      | 1455469_at   | -1.4        | 3.7E-03          | 5.3           | 5.9           |
| Slc13a1     | 1431379_a_at | -1.5        | 2.8E-03          | 11.1          | 11.6          |
| Slc39a8     | 1416832_at   | -1.5        | 8.5E-04          | 6.3           | 6.8           |
| Slc2a1      | 1426599_a_at | -1.5        | 3.1E-03          | 6.3           | 6.9           |
| Slc5a9      | 1426634_at   | -1.5        | 1.8E-04          | 6.9           | 7.5           |

|             |              |        |         |      |      |
|-------------|--------------|--------|---------|------|------|
| Slc30a2     | 1427339_at   | -1.5   | 3.6E-03 | 7.6  | 8.2  |
| Slc37a4     | 1417042_at   | -1.5   | 5.8E-05 | 9.5  | 10.1 |
| Slc7a8      | 1417929_at   | -1.6   | 2.8E-05 | 8.0  | 8.6  |
| Slc5a4a     | 1421637_at   | -1.7   | 6.8E-03 | 8.0  | 8.7  |
| Slc16a10    | 1436368_at   | -1.7   | 3.6E-06 | 9.1  | 9.9  |
| Slc5a9      | 1439494_at   | -1.7   | 8.1E-05 | 7.0  | 7.7  |
| Slc20a1     | 1448568_a_at | -1.7   | 1.4E-03 | 8.6  | 9.4  |
| Slc16a9     | 1429727_at   | -1.7   | 6.7E-05 | 9.1  | 9.8  |
| Slc16a9     | 1429726_at   | -1.9   | 3.6E-04 | 6.9  | 7.8  |
| Slc13a1     | 1430804_at   | -2.1   | 5.4E-03 | 7.8  | 8.9  |
| Slc13a2     | 1418857_at   | -2.1   | 1.2E-05 | 10.8 | 11.8 |
| Slc4a7      | 1457528_at   | -2.3   | 3.8E-04 | 9.0  | 10.2 |
| Slc37a2     | 1452492_a_at | -3.3   | 1.4E-04 | 3.9  | 5.6  |
| Npc1L1      | 1438514_at   | -1.5   | 4.7E-04 | 11.7 | 12.3 |
| Cyp4a10     | 1424853_s_at | 1447.2 | 8.1E-14 | 12.3 | 1.8  |
| Cyp2c65     | 1429994_s_at | 2.6    | 6.4E-07 | 12.5 | 11.2 |
| Cyp4f16     | 1430172_a_at | 1.9    | 8.5E-05 | 10.7 | 9.7  |
| Cyp4f16     | 1417277_at   | 1.9    | 4.4E-05 | 10.3 | 9.3  |
| Cyp2d22     | 1419039_at   | 1.7    | 3.3E-04 | 7.9  | 7.1  |
| Cyp4b1      | 1416194_at   | 1.7    | 6.1E-04 | 11.7 | 10.9 |
| Cyp2d22     | 1419040_at   | 1.5    | 4.4E-03 | 7.6  | 7.0  |
| Cyp3a13     | 1419523_at   | -1.2   | 5.2E-03 | 12.7 | 13.0 |
| Cyp2j6      | 1417952_at   | -1.4   | 1.2E-03 | 10.4 | 10.8 |
| Cyp2s1      | 1428283_at   | -1.4   | 4.6E-04 | 8.7  | 9.2  |
| Akr1b8      | 1448894_at   | 13.4   | 1.6E-06 | 7.9  | 4.2  |
| Gstm4       | 1424835_at   | 2.0    | 1.5E-04 | 5.5  | 4.5  |
| Ephx1       | 1422438_at   | 1.7    | 1.9E-03 | 9.6  | 8.8  |
| Ephx2       | 1448499_a_at | 1.5    | 3.3E-04 | 12.5 | 11.9 |
| Ugt1a2 ///  |              |        |         |      |      |
| Ugt1a6a /// |              |        |         |      |      |
| Ugt1a10 /// |              |        |         |      |      |
| Ugt1a7c /// |              |        |         |      |      |
| Ugt1a5 ///  |              |        |         |      |      |
| Ugt1a9 ///  |              |        |         |      |      |
| Ugt1a6b /// |              |        |         |      |      |
| Ugt1a1      | 1426261_s_at | 1.5    | 6.5E-04 | 12.5 | 11.9 |
| Ugt1a2 ///  |              |        |         |      |      |
| Ugt1a6a /// |              |        |         |      |      |
| Ugt1a10 /// |              |        |         |      |      |
| Ugt1a7c /// |              |        |         |      |      |
| Ugt1a5 ///  |              |        |         |      |      |
| Ugt1a9 ///  |              |        |         |      |      |
| Ugt1a6b /// |              |        |         |      |      |
| Ugt1a1      | 1424783_a_at | 1.5    | 9.7E-05 | 12.2 | 11.6 |
| Mgst1       | 1415897_a_at | 1.4    | 2.3E-04 | 12.6 | 12.0 |
| Gstk1       | 1452823_at   | 1.3    | 3.6E-03 | 10.5 | 10.1 |
| Ugt1a2      | 1426260_a_at | 1.3    | 4.7E-03 | 12.9 | 12.6 |
| Gstt2       | 1417883_at   | 1.2    | 4.2E-03 | 9.4  | 9.1  |
| Ugt2b34     | 1427961_s_at | -1.3   | 6.1E-03 | 12.0 | 12.3 |
| Gstm5       | 1416842_at   | -1.3   | 2.7E-03 | 8.7  | 9.0  |
| Sult1b1     | 1418940_at   | -1.3   | 1.4E-03 | 11.8 | 12.2 |
| Ugt2a3      | 1450133_at   | -1.4   | 6.4E-04 | 10.1 | 10.6 |

|         |              |      |         |      |      |
|---------|--------------|------|---------|------|------|
| Ugt2b34 | 1427960_at   | -1.5 | 3.5E-04 | 11.6 | 12.2 |
| Akr1c12 | 1422000_at   | -1.5 | 4.5E-05 | 10.6 | 11.2 |
| Akr1c12 | 1450455_s_at | -1.7 | 9.4E-06 | 12.1 | 12.9 |
| Akr1c13 | 1418672_at   | -1.7 | 5.6E-05 | 11.2 | 11.9 |
| Akr1c19 | 1455454_at   | -1.9 | 2.1E-04 | 9.4  | 10.3 |
| Abca1   | 1450392_at   | 12.1 | 3.1E-05 | 6.9  | 3.3  |
| Abca1   | 1421839_at   | 10.9 | 4.2E-07 | 7.9  | 4.5  |
| Abca1   | 1421840_at   | 5.1  | 2.5E-06 | 10.3 | 8.0  |
| Abcd3   | 1416679_at   | 2.8  | 1.6E-07 | 13.1 | 11.6 |
| Abcg2   | 1422906_at   | 1.9  | 4.2E-06 | 11.8 | 10.8 |
| Abcd1   | 1418838_at   | 1.2  | 7.2E-03 | 9.4  | 9.1  |

Presented are all PPAR $\alpha$ -dependently regulated barrier genes in the small intestine after acute WY14643 treatment. Microarray analysis was performed as described in materials and methods. Listed are the gene symbols, corresponding Affymetrix probeset identifiers, fold changes (FC), the comparison p-values as determined in wild-type mice, and the average log<sub>2</sub> transformed expression estimates of the probesets in wild-type (WT) and PPAR $\alpha$ -null (KO) mice. A positive FC value indicates a gene expressed at higher levels, whereas a negative FC indicates a gene expressed at lower levels in the treated wild-type mice compared to control. Note that all these genes were not regulated in the PPAR $\alpha$ -null mice.
