# Supplementary material for: PPARalpha-mediated effects of dietary lipids on intestinal barrier gene expression
Source: PubMed Central journal article supplement (PMC2408604; doi:10.1186/1471-2164-9-231), 2008-05-19
Supplement: 1471-2164-9-231-S3.pdf [file 1471-2164-9-231-S3.pdf]

**Additional data, table 3:  
PPAR $\alpha$ -dependently regulated barrier genes after acute treatment (6hr) with  
eicosapentaenoic acid**

| <b>Gene symbol</b> | <b>Probe set ID</b> | <b>FC</b> | <b>P-value</b> | <b>Average WT</b> | <b>Average KO</b> |
|--------------------|---------------------|-----------|----------------|-------------------|-------------------|
| Slc22a5            | 1421848_at          | 3.2       | 1.5E-06        | 8.2               | 6.5               |
| Slc25a20           | 1423109_s_at        | 2.6       | 1.2E-08        | 10.1              | 8.7               |
| Slc19a3            | 1450348_at          | 2.4       | 1.3E-04        | 5.4               | 4.2               |
| Slc25a20           | 1423108_at          | 2.3       | 1.6E-08        | 10.6              | 9.4               |
| Slc22a5            | 1440536_at          | 2.3       | 2.4E-04        | 4.9               | 3.7               |
| Slc22a5            | 1450395_at          | 2.0       | 4.6E-07        | 10.2              | 9.2               |
| Slc6a3             | 1417415_at          | 1.8       | 4.7E-03        | 4.9               | 4.1               |
| Slc23a1            | 1421912_at          | 1.7       | 1.9E-03        | 7.8               | 7.1               |
| Slc27a2            | 1416316_at          | 1.6       | 4.8E-04        | 10.6              | 9.9               |
| Slc25a10           | 1416954_at          | 1.5       | 2.1E-04        | 9.2               | 8.6               |
| Slc16a13           | 1453056_at          | 1.5       | 8.7E-03        | 5.1               | 4.5               |
| Slc27a4            | 1424441_at          | 1.5       | 7.2E-05        | 10.3              | 9.7               |
| Slc25a10           | 1416955_at          | 1.4       | 9.2E-03        | 7.7               | 7.2               |
| Slc20a2            | 1457302_at          | 1.4       | 7.6E-04        | 8.0               | 7.4               |
| Slc35a3            | 1429649_at          | 1.3       | 5.9E-03        | 9.1               | 8.6               |
| Slc23a2            | 1442983_at          | 1.3       | 5.7E-03        | 7.0               | 6.7               |
| Slc20a2            | 1434235_at          | 1.3       | 6.0E-03        | 7.3               | 7.0               |
| Slc25a4            | 1455069_x_at        | 1.2       | 1.5E-03        | 9.3               | 9.0               |
| Slc25a4            | 1424562_a_at        | 1.2       | 3.1E-03        | 9.8               | 9.6               |
| Slc6a4             | 1417150_at          | -1.2      | 6.1E-03        | 9.7               | 10.0              |
| Slc12a7            | 1418257_at          | -1.2      | 9.2E-03        | 9.1               | 9.3               |
| Slc15a1            | 1419343_at          | -1.3      | 4.2E-03        | 8.6               | 9.0               |
| Slc30a2            | 1427339_at          | -1.4      | 1.6E-03        | 7.5               | 8.0               |
| Slc16a10           | 1436368_at          | -1.4      | 6.5E-03        | 8.7               | 9.2               |
| Slc5a9             | 1426634_at          | -1.4      | 2.3E-03        | 6.3               | 6.9               |
| Slc4a4             | 1426432_a_at        | -1.5      | 7.1E-03        | 4.9               | 5.5               |
| Slc7a8             | 1417929_at          | -1.6      | 8.5E-04        | 7.0               | 7.7               |
| Slc36a1            | 1428793_at          | -1.6      | 4.6E-03        | 8.3               | 9.0               |
| Slc5a9             | 1439494_at          | -1.7      | 8.2E-04        | 6.4               | 7.2               |
| Slc11a2            | 1441709_at          | -1.7      | 1.4E-04        | 5.4               | 6.2               |
| Slc13a1            | 1430804_at          | -2.0      | 3.0E-04        | 9.4               | 10.4              |
| Slc34a2            | 1416854_at          | -2.7      | 4.6E-03        | 7.4               | 8.9               |
| Npc1L1             | 1438514_at          | -1.4      | 3.6E-04        | 11.4              | 11.9              |
| Cyp4a10            | 1424853_s_at        | 120.2     | 4.7E-12        | 8.8               | 1.9               |
| Cyp2c29            | 1417651_at          | 3.2       | 4.8E-04        | 6.4               | 4.7               |
| Cyp2c65            | 1429994_s_at        | 2.3       | 2.2E-08        | 12.2              | 11.0              |
| Cyp4f16            | 1417277_at          | 1.5       | 1.9E-04        | 9.8               | 9.2               |
| Cyp4f16            | 1430172_a_at        | 1.5       | 2.4E-03        | 10.2              | 9.6               |
| Cyp2d22            | 1419039_at          | 1.5       | 2.0E-04        | 6.7               | 6.2               |
| Cyp51              | 1450646_at          | -1.4      | 6.8E-04        | 9.2               | 9.6               |
| Akr1b8             | 1448894_at          | 3.2       | 1.9E-06        | 7.6               | 5.9               |
| Gstm3              | 1427473_at          | 2.4       | 7.5E-05        | 7.3               | 6.1               |
| Hs3st1             | 1423450_a_at        | 2.1       | 5.9E-03        | 6.7               | 5.6               |
| Gstm3              | 1427474_s_at        | 2.0       | 7.8E-05        | 10.3              | 9.3               |

|                 |              |     |         |      |      |
|-----------------|--------------|-----|---------|------|------|
| Gstm4           | 1424835_at   | 1.8 | 1.8E-05 | 5.0  | 4.2  |
| Gstm1           | 1448330_at   | 1.7 | 3.9E-04 | 9.0  | 8.3  |
| Ephx1           | 1422438_at   | 1.6 | 2.1E-05 | 8.9  | 8.2  |
| Gstm1           | 1416416_x_at | 1.6 | 3.9E-04 | 9.1  | 8.4  |
| Ephx2           | 1448499_a_at | 1.4 | 3.4E-03 | 11.6 | 11.1 |
| Gstm6           | 1422072_a_at | 1.3 | 4.5E-03 | 8.1  | 7.7  |
| Ugt1a2 ///      |              |     |         |      |      |
| Ugt1a6a ///     |              |     |         |      |      |
| Ugt1a10 ///     |              |     |         |      |      |
| Ugt1a7c ///     |              |     |         |      |      |
| Ugt1a5 ///      |              |     |         |      |      |
| Ugt1a9 ///      |              |     |         |      |      |
| Ugt1a6b ///     |              |     |         |      |      |
| Ugt1a1          | 1426261_s_at | 1.3 | 1.9E-03 | 11.9 | 11.6 |
| Mgst1           | 1415897_a_at | 1.3 | 9.2E-04 | 12.3 | 11.9 |
| Gstk1           | 1452823_at   | 1.3 | 4.3E-04 | 10.4 | 10.0 |
| Ugt1a2 ///      |              |     |         |      |      |
| Ugt1a6a ///     |              |     |         |      |      |
| Ugt1a10 ///     |              |     |         |      |      |
| Ugt1a7c ///     |              |     |         |      |      |
| Ugt1a5 ///      |              |     |         |      |      |
| Ugt1a9 ///      |              |     |         |      |      |
| Ugt1a6b ///     |              |     |         |      |      |
| Ugt1a1          | 1424783_a_at | 1.2 | 7.6E-03 | 11.6 | 11.3 |
| Gsta1 /// Gsta2 | 1421041_s_at | 1.2 | 6.0E-03 | 13.8 | 13.6 |
| Abca1           | 1450392_at   | 3.2 | 1.1E-04 | 5.1  | 3.4  |
| Abca1           | 1421839_at   | 2.9 | 1.9E-04 | 6.1  | 4.6  |
| Abca1           | 1421840_at   | 2.1 | 3.6E-06 | 9.0  | 7.9  |
| Abcd3           | 1416679_at   | 1.7 | 3.4E-07 | 12.4 | 11.7 |

Presented are all PPAR $\alpha$ -dependently regulated barrier genes in the small intestine after acute EPA (eicosapentaenoic acid ) treatment. Microarray analysis was performed as described in materials and methods. Listed are the gene symbols, corresponding Affymetrix probeset identifiers, fold changes (FC), the comparison p-values as determined in wild-type mice, and the average log<sub>2</sub> transformed expression estimates of the probesets in wild-type (WT) and PPAR $\alpha$ -null (KO) mice. A positive FC value indicates a gene expressed at higher levels, whereas a negative FC indicates a gene expressed at lower levels in the treated wild-type mice compared to control. Note that all these genes were not regulated in the PPAR $\alpha$ -null mice.
