# Supplementary material for: PPARalpha-mediated effects of dietary lipids on intestinal barrier gene expression
Source: PubMed Central journal article supplement (PMC2408604; doi:10.1186/1471-2164-9-231), 2008-05-19
Supplement: 1471-2164-9-231-S4.pdf [file 1471-2164-9-231-S4.pdf]

**Additional data table 4:  
PPAR $\alpha$ -dependently regulated barrier genes after acute treatment (6hr) with  
docosahexanoic acid**

| Gene symbol                                                 | Probe set ID | FC    | P-value | Average WT | Average KO |
|-------------------------------------------------------------|--------------|-------|---------|------------|------------|
| Slc22a5                                                     | 1421848_at   | 4.2   | 4.0E-07 | 8.5        | 6.4        |
| Slc22a5                                                     | 1440536_at   | 3.1   | 6.0E-07 | 5.7        | 4.1        |
| Slc22a5                                                     | 1450395_at   | 2.7   | 5.3E-08 | 10.7       | 9.2        |
| Slc25a20                                                    | 1423109_s_at | 2.4   | 1.4E-04 | 10.2       | 9.0        |
| Slc25a20                                                    | 1423108_at   | 2.4   | 1.2E-05 | 10.9       | 9.6        |
| Slc16a13                                                    | 1453056_at   | 1.8   | 1.0E-04 | 5.3        | 4.4        |
| Slc20a2                                                     | 1457302_at   | 1.4   | 8.3E-04 | 7.8        | 7.3        |
| Slc27a4                                                     | 1424441_at   | 1.4   | 2.1E-03 | 10.3       | 9.9        |
| Slc4a4                                                      | 1434096_at   | -1.3  | 3.4E-03 | 8.9        | 9.3        |
| Slc6a4                                                      | 1417150_at   | -1.3  | 4.1E-04 | 9.7        | 10.1       |
| Slc19a1                                                     | 1448132_at   | -1.4  | 2.2E-03 | 7.3        | 7.8        |
| Slc4a4                                                      | 1452071_at   | -1.4  | 9.2E-03 | 8.2        | 8.7        |
| Slc9a6                                                      | 1435009_at   | -1.4  | 7.9E-03 | 4.4        | 4.9        |
| Slc44a4                                                     | 1416596_at   | -1.5  | 8.8E-04 | 9.7        | 10.3       |
| Slc6a8                                                      | 1417116_at   | -1.5  | 4.7E-04 | 10.7       | 11.3       |
| Slc4a4                                                      | 1426432_a_at | -1.5  | 3.8E-03 | 5.1        | 5.7        |
| Slc4a4                                                      | 1421225_a_at | -1.5  | 7.2E-03 | 7.0        | 7.6        |
| Slc30a2                                                     | 1427339_at   | -1.6  | 3.5E-04 | 7.5        | 8.2        |
| Slc17a5                                                     | 1429116_at   | -1.7  | 1.9E-04 | 6.1        | 6.9        |
| Slc16a10                                                    | 1436368_at   | -1.8  | 6.3E-03 | 8.6        | 9.4        |
| Slc36a1                                                     | 1428793_at   | -1.8  | 3.9E-03 | 8.3        | 9.1        |
| Slc5a9                                                      | 1426634_at   | -1.8  | 2.5E-03 | 6.1        | 7.0        |
| Slc7a8                                                      | 1417929_at   | -2.0  | 9.4E-04 | 7.3        | 8.3        |
| Slc5a9                                                      | 1439494_at   | -2.0  | 1.5E-03 | 6.3        | 7.3        |
| Slc13a2                                                     | 1418857_at   | -2.2  | 9.5E-04 | 10.3       | 11.4       |
| Slc5a12                                                     | 1437755_at   | -3.8  | 4.7E-03 | 7.2        | 9.1        |
| Slc34a2                                                     | 1416854_at   | -5.0  | 2.2E-03 | 5.2        | 7.6        |
| Npc1L1                                                      | 1438514_at   | -1.4  | 5.7E-03 | 11.3       | 11.7       |
| Cyp4a10                                                     | 1424853_s_at | 160.3 | 7.9E-11 | 9.4        | 2.1        |
| Cyp2c65                                                     | 1429994_s_at | 2.5   | 1.9E-06 | 12.3       | 11.0       |
| Cyp4f16                                                     | 1417277_at   | 1.4   | 1.8E-03 | 9.7        | 9.2        |
| Akr1b8                                                      | 1448894_at   | 5.1   | 2.9E-03 | 8.6        | 6.3        |
| Hs3st1                                                      | 1423450_a_at | 2.7   | 3.5E-04 | 5.5        | 4.1        |
| Gsta2                                                       | 1421040_a_at | 2.7   | 2.0E-06 | 7.8        | 6.3        |
| Gstm3                                                       | 1427473_at   | 2.6   | 1.4E-04 | 8.0        | 6.6        |
| Gstm3                                                       | 1427474_s_at | 2.1   | 2.2E-04 | 10.9       | 9.8        |
| Ephx1                                                       | 1422438_at   | 1.9   | 1.5E-04 | 9.0        | 8.1        |
| Gstm4                                                       | 1424835_at   | 1.8   | 2.7E-03 | 5.1        | 4.3        |
| Gsta3                                                       | 1423436_at   | 1.8   | 5.4E-03 | 6.4        | 5.5        |
| Gstk1                                                       | 1452823_at   | 1.5   | 3.7E-04 | 10.3       | 9.8        |
| Gsta4                                                       | 1416368_at   | 1.5   | 3.3E-03 | 12.2       | 11.6       |
| Gsta1 /// Gsta2<br>Ugt1a2 ///<br>Ugt1a6a ///<br>Ugt1a10 /// | 1421041_s_at | 1.3   | 1.3E-03 | 14.0       | 13.6       |
|                                                             | 1424783_a_at | 1.3   | 3.6E-03 | 11.8       | 11.4       |

|             |              |      |         |      |      |
|-------------|--------------|------|---------|------|------|
| Ugt1a7c /// |              |      |         |      |      |
| Ugt1a5 ///  |              |      |         |      |      |
| Ugt1a9 ///  |              |      |         |      |      |
| Ugt1a6b /// |              |      |         |      |      |
| Ugt1a1      |              |      |         |      |      |
| Ugt1a2 ///  |              |      |         |      |      |
| Ugt1a6a /// |              |      |         |      |      |
| Ugt1a10 /// |              |      |         |      |      |
| Ugt1a7c /// |              |      |         |      |      |
| Ugt1a5 ///  |              |      |         |      |      |
| Ugt1a9 ///  |              |      |         |      |      |
| Ugt1a6b /// |              |      |         |      |      |
| Ugt1a1      | 1426261_s_at | 1.3  | 9.2E-03 | 12.1 | 11.7 |
| Mgst1       | 1415897_a_at | 1.2  | 3.9E-03 | 12.4 | 12.1 |
| Ndst2       | 1417931_at   | -1.6 | 2.6E-03 | 4.4  | 5.1  |
| Sult1a1     | 1427345_a_at | -1.6 | 8.3E-03 | 6.3  | 7.0  |
| Abcd3       | 1416679_at   | 1.8  | 7.5E-07 | 12.6 | 11.7 |
| Abce1       | 1442071_at   | 1.7  | 3.5E-03 | 6.3  | 5.6  |
| Abcg2       | 1422906_at   | 1.3  | 2.3E-03 | 11.2 | 10.8 |
| Abca8a      | 1427371_at   | -1.3 | 7.4E-03 | 7.1  | 7.5  |

Presented are all PPAR $\alpha$ -dependently regulated barrier genes in the small intestine after acute DHA (docosahexanoic acid) treatment. Microarray analysis was performed as described in materials and methods. Listed are the gene symbols, corresponding Affymetrix probeset identifiers, fold changes (FC), the comparison p-values as determined in wild-type mice, and the average log<sub>2</sub> transformed expression estimates of the probesets in wild-type (WT) and PPAR $\alpha$ -null (KO) mice. A positive FC value indicates a gene expressed at higher levels, whereas a negative FC indicates a gene expressed at lower levels in the treated wild-type mice compared to control. Note that all these genes were not regulated in the PPAR $\alpha$ -null mice.
