# Supplementary material for: PPARalpha-mediated effects of dietary lipids on intestinal barrier gene expression
Source: PubMed Central journal article supplement (PMC2408604; doi:10.1186/1471-2164-9-231), 2008-05-19
Supplement: 1471-2164-9-231-S5.pdf [file 1471-2164-9-231-S5.pdf]

**Additional data, table 5:  
PPAR $\alpha$ -dependently regulated barrier genes after acute (6hr) and long-term (5 day) treatment with WY14643**

| Gene symbol | Probe set ID | FC WY acute | P-value acute | FC WY 5 days | P-value 5 days |
|-------------|--------------|-------------|---------------|--------------|----------------|
| Slc16a13    | 1453056_at   | 10.7        | 5.90E-07      | 13.8         | 7.37E-10       |
| Slc22a5     | 1440536_at   | 8.3         | 5.10E-08      | 11.7         | 4.24E-09       |
| Slc22a5     | 1421848_at   | 7.7         | 1.60E-07      | 7.1          | 4.29E-10       |
| Slc25a20    | 1423109_s_at | 6.8         | 1.80E-09      | 6.6          | 6.48E-10       |
| Slc22a3     | 1420444_at   | 5.8         | 5.10E-07      | 30.5         | 9.46E-09       |
| Slc25a20    | 1423108_at   | 5.6         | 3.40E-08      | 5.5          | 3.33E-10       |
| Slc25a30    | 1420836_at   | 5.5         | 8.10E-06      | 7.0          | 1.56E-09       |
| Slc22a5     | 1450395_at   | 4.7         | 3.20E-07      | 5.2          | 2.10E-10       |
| Slc25a30    | 1420835_at   | 4.2         | 2.40E-05      | 6.6          | 1.06E-09       |
| Slc25a30    | 1450018_s_at | 3.4         | 2.90E-05      | 5.7          | 5.81E-07       |
| Slc27a2     | 1416316_at   | 2.2         | 8.20E-06      | 3.9          | 5.26E-09       |
| Slc25a4     | 1455069_x_at | 2.1         | 1.40E-06      | 3.8          | 2.99E-08       |
| Slc25a4     | 1434897_a_at | 2           | 1.40E-06      | 3.6          | 1.56E-09       |
| Slc25a4     | 1424562_a_at | 1.9         | 9.90E-07      | 3.5          | 9.78E-08       |
| Slc5a6      | 1435860_at   | 1.8         | 1.70E-04      | -1.2         | 3.69E-01       |
| Slc27a4     | 1424441_at   | 1.7         | 1.50E-04      | 1.5          | 8.93E-05       |
| Slc25a10    | 1416954_at   | 1.6         | 7.00E-05      | 1.6          | 6.73E-04       |
| Slc16a1     | 1415802_at   | 1.5         | 3.70E-03      | 1.0          | 7.21E-01       |
| Slc7a7      | 1447181_s_at | 1.5         | 3.40E-03      | 1.3          | 1.69E-02       |
| Slc35f5     | 1452059_at   | 1.4         | 7.60E-04      | 1.3          | 4.50E-03       |
| Slc23a2     | 1445589_at   | 1.4         | 4.90E-04      | 2.0          | 7.99E-05       |
| Slc7a7      | 1417392_a_at | 1.3         | 4.00E-04      | 1.2          | 1.98E-02       |
| Slc25a11    | 1426586_at   | 1.2         | 8.40E-03      | 1.3          | 7.07E-03       |
| Slc4a4      | 1434096_at   | -1.3        | 4.80E-03      | -1.8         | 3.27E-06       |
| Slc5a1      | 1419057_at   | -1.3        | 3.00E-03      | -1.4         | 1.26E-02       |
| Slc44a4     | 1416596_at   | -1.3        | 4.70E-03      | -1.8         | 1.10E-06       |
| Slc25a12    | 1428440_at   | -1.3        | 2.10E-03      | 1.1          | 3.84E-01       |
| Slc19a1     | 1420138_at   | -1.3        | 2.30E-03      | 1.1          | 5.25E-01       |
| Slc35d2     | 1453300_at   | -1.3        | 4.00E-03      | 1.1          | 1.46E-01       |
| Slc46a1     | 1426715_s_at | -1.3        | 5.90E-04      | -1.3         | 8.81E-03       |
| Slc46a1     | 1426714_at   | -1.3        | 9.80E-04      | -1.2         | 2.24E-02       |
| Slco2b1     | 1433933_s_at | -1.3        | 6.30E-04      | 1.1          | 1.63E-01       |
| Slc30a1     | 1436164_at   | -1.3        | 8.90E-03      | -1.3         | 1.57E-02       |
| Slc17a5     | 1429116_at   | -1.4        | 2.70E-03      | -1.5         | 5.28E-04       |
| Slc19a2     | 1441315_s_at | -1.4        | 5.50E-04      | 1.3          | 8.70E-03       |
| Slc39a14    | 1427035_at   | -1.4        | 4.60E-03      | -1.3         | 3.91E-03       |
| Slc12a6     | 1449878_a_at | -1.4        | 4.10E-03      | -1.2         | 1.47E-01       |
| Slc6a4      | 1417150_at   | -1.4        | 2.00E-03      | -1.5         | 7.81E-04       |
| Slc5a1      | 1455431_at   | -1.4        | 5.10E-04      | -1.4         | 1.51E-03       |
| Slc2a2      | 1449067_at   | -1.4        | 2.20E-03      | -1.4         | 5.11E-04       |
| Slc1a1      | 1448299_at   | -1.4        | 4.00E-03      | -1.7         | 2.45E-06       |
| Slc6a7      | 1455469_at   | -1.4        | 3.70E-03      | -1.0         | 6.50E-01       |
| Slc13a1     | 1431379_a_at | -1.5        | 2.80E-03      | -1.5         | 1.77E-02       |
| Slc39a8     | 1416832_at   | -1.5        | 8.50E-04      | -0.9         | 5.08E-01       |

|             |              |        |          |        |          |
|-------------|--------------|--------|----------|--------|----------|
| Slc2a1      | 1426599_a_at | -1.5   | 3.10E-03 | -2.3   | 7.24E-07 |
| Slc5a9      | 1426634_at   | -1.5   | 1.80E-04 | -1.8   | 1.25E-03 |
| Slc30a2     | 1427339_at   | -1.5   | 3.60E-03 | -1.7   | 4.17E-05 |
| Slc37a4     | 1417042_at   | -1.5   | 5.80E-05 | -1.0   | 8.74E-01 |
| Slc7a8      | 1417929_at   | -1.6   | 2.80E-05 | -2.0   | 8.84E-05 |
| Slc5a4a     | 1421637_at   | -1.7   | 6.80E-03 | -3.8   | 2.55E-07 |
| Slc16a10    | 1436368_at   | -1.7   | 3.60E-06 | -1.6   | 1.01E-03 |
| Slc5a9      | 1439494_at   | -1.7   | 8.10E-05 | -1.6   | 2.22E-04 |
| Slc20a1     | 1448568_a_at | -1.7   | 1.40E-03 | -2.1   | 6.60E-05 |
| Slc16a9     | 1429727_at   | -1.7   | 6.70E-05 | -0.5   | 3.40E-03 |
| Slc16a9     | 1429726_at   | -1.9   | 3.60E-04 | -0.6   | 1.60E-02 |
| Slc13a1     | 1430804_at   | -2.1   | 5.40E-03 | -2.1   | 1.28E-04 |
| Slc13a2     | 1418857_at   | -2.1   | 1.20E-05 | -1.1   | 4.22E-01 |
| Slc4a7      | 1457528_at   | -2.3   | 3.80E-04 | -2.3   | 4.96E-05 |
| Slc37a2     | 1452492_a_at | -3.3   | 1.40E-04 | -1.3   | 1.23E-02 |
| Npc1l1      | 1438514_at   | -1.5   | 4.70E-04 | -2.3   | 2.43E-07 |
| Cyp4a10     | 1424853_s_at | 1447.2 | 8.10E-14 | 1170.0 | 1.97E-17 |
| Cyp2c65     | 1429994_s_at | 2.6    | 6.40E-07 | 2.3    | 1.07E-07 |
| Cyp4f16     | 1430172_a_at | 1.9    | 8.50E-05 | -1.3   | 8.25E-03 |
| Cyp4f16     | 1417277_at   | 1.9    | 4.40E-05 | -1.5   | 8.88E-04 |
| Cyp2d22     | 1419039_at   | 1.7    | 3.30E-04 | 3.5    | 1.12E-08 |
| Cyp4b1      | 1416194_at   | 1.7    | 6.10E-04 | 3.3    | 3.68E-09 |
| Cyp2d22     | 1419040_at   | 1.5    | 4.40E-03 | 3.1    | 2.71E-06 |
| Cyp3a13     | 1419523_at   | -1.2   | 5.20E-03 | -1.4   | 3.52E-04 |
| Cyp2j6      | 1417952_at   | -1.4   | 1.20E-03 | -1.7   | 1.42E-04 |
| Cyp2s1      | 1428283_at   | -1.4   | 4.60E-04 | -1.2   | 7.50E-03 |
| Akr1b8      | 1448894_at   | 13.4   | 1.60E-06 | 42.2   | 1.61E-10 |
| Gstm4       | 1424835_at   | 2      | 1.50E-04 | 1.9    | 7.58E-03 |
| Ephx1       | 1422438_at   | 1.7    | 1.90E-03 | 2.7    | 1.31E-05 |
| Ephx2       | 1448499_a_at | 1.5    | 3.30E-04 | 2.2    | 9.83E-08 |
| Ugt1a2 ///  |              |        |          |        |          |
| Ugt1a6a /// |              |        |          |        |          |
| Ugt1a10 /// |              |        |          |        |          |
| Ugt1a7c /// |              |        |          |        |          |
| Ugt1a5 ///  |              |        |          |        |          |
| Ugt1a9 ///  |              |        |          |        |          |
| Ugt1a6b /// |              |        |          |        |          |
| Ugt1a1      | 1426261_s_at | 1.5    | 6.50E-04 | 1.6    | 5.12E-06 |
| Ugt1a2 ///  |              |        |          |        |          |
| Ugt1a6a /// |              |        |          |        |          |
| Ugt1a10 /// |              |        |          |        |          |
| Ugt1a7c /// |              |        |          |        |          |
| Ugt1a5 ///  |              |        |          |        |          |
| Ugt1a9 ///  |              |        |          |        |          |
| Ugt1a6b /// |              |        |          |        |          |
| Ugt1a1      | 1424783_a_at | 1.5    | 9.70E-05 | 1.8    | 1.89E-06 |
| Mgst1       | 1415897_a_at | 1.4    | 2.30E-04 | 2.0    | 1.21E-07 |
| Gstk1       | 1452823_at   | 1.3    | 3.60E-03 | 1.5    | 7.65E-04 |
| Ugt1a2      | 1426260_a_at | 1.3    | 4.70E-03 | 1.3    | 8.11E-04 |
| Gstt2       | 1417883_at   | 1.2    | 4.20E-03 | 1.9    | 1.68E-06 |

|         |              |      |          |      |          |
|---------|--------------|------|----------|------|----------|
| Ugt2b34 | 1427961_s_at | -1.3 | 6.10E-03 | -1.2 | 1.57E-02 |
| Gstm5   | 1416842_at   | -1.3 | 2.70E-03 | 1.2  | 1.59E-02 |
| Sult1b1 | 1418940_at   | -1.3 | 1.40E-03 | -1.3 | 4.38E-04 |
| Ugt2a3  | 1450133_at   | -1.4 | 6.40E-04 | -1.7 | 7.34E-06 |
| Ugt2b34 | 1427960_at   | -1.5 | 3.50E-04 | -1.4 | 2.48E-04 |
| Akr1c12 | 1422000_at   | -1.5 | 4.50E-05 | 1.1  | 1.93E-01 |
| Akr1c12 | 1450455_s_at | -1.7 | 9.40E-06 | 1.1  | 4.70E-01 |
| Akr1c13 | 1418672_at   | -1.7 | 5.60E-05 | 1.1  | 4.96E-01 |
| Akr1c19 | 1455454_at   | -1.9 | 2.10E-04 | 1.5  | 4.40E-03 |
| Abca1   | 1450392_at   | 12.1 | 3.10E-05 | 8.8  | 1.71E-07 |
| Abca1   | 1421839_at   | 10.9 | 4.20E-07 | 6.3  | 4.61E-08 |
| Abca1   | 1421840_at   | 5.1  | 2.50E-06 | 4.1  | 4.15E-07 |
| Abcd3   | 1416679_at   | 2.8  | 1.60E-07 | 2.8  | 4.29E-09 |
| Abcg2   | 1422906_at   | 1.9  | 4.20E-06 | 1.5  | 4.77E-04 |
| Abcd1   | 1418838_at   | 1.2  | 7.20E-03 | 1.1  | 4.60E-01 |

Presented are the fold changes and significance levels of all PPAR $\alpha$ -dependently regulated barrier genes in the small intestine after acute (6hr) treatment with WY14643, and the corresponding fold changes observed after long-term (5 days) treatment with WY14643. Data on the acute effects of WY14643 are from the current manuscript, whereas the data from the 5-day experiment were taken from Büniger et al.

Listed are the gene symbols, corresponding Affymetrix probeset identifiers, fold changes (FC) and comparison p-values as determined in wild-type mice after acute exposure, and FC and comparison p-values as determined in wild-type mice after 5-day exposure to WY14643. Of all genes that were PPAR $\alpha$ -dependently regulated after 6 hr exposure, 74% was also regulated after 5 days treatment with WY14643.

#### Reference:

Büniger M, van den Bosch HM, van der Meijde J, Kersten S, Hooiveld GJEJ, Müller M. Genome-wide analysis of PPARalpha activation in murine small intestine. *Physiol Genomics*. 2007;30(2):192-204.

PubMed ID: 17426115
