# Supplementary material for: PPARalpha-mediated effects of dietary lipids on intestinal barrier gene expression
Source: PubMed Central journal article supplement (PMC2408604; doi:10.1186/1471-2164-9-231), 2008-05-19
Supplement: 1471-2164-9-231-S6.pdf [file 1471-2164-9-231-S6.pdf]

**Additional data, table 6: Overlap of PPAR $\alpha$ -dependently regulated barrier genes after acute treatment with WY14643, eicosapentaenoic acid, and docosahexanoic acid**

**Overlap WY14643 and EPA**

| Gene symbol                                    | Probe set ID | FC WY  | FC EPA |
|------------------------------------------------|--------------|--------|--------|
| Slc16a13                                       | 1453056_at   | 10.7   | 1.5    |
| Slc22a5                                        | 1440536_at   | 8.3    | 2.3    |
| Slc22a5                                        | 1421848_at   | 7.7    | 3.2    |
| Slc25a20                                       | 1423109_s_at | 6.8    | 2.6    |
| Slc25a20                                       | 1423108_at   | 5.6    | 2.3    |
| Slc22a5                                        | 1450395_at   | 4.7    | 2.0    |
| Slc27a2                                        | 1416316_at   | 2.2    | 1.6    |
| Slc25a4                                        | 1455069_x_at | 2.1    | 1.2    |
| Slc25a4                                        | 1424562_a_at | 1.9    | 1.2    |
| Slc27a4                                        | 1424441_at   | 1.7    | 1.5    |
| Slc25a10                                       | 1416954_at   | 1.6    | 1.5    |
| Slc6a4                                         | 1417150_at   | -1.4   | -1.2   |
| Slc5a9                                         | 1426634_at   | -1.5   | -1.4   |
| Slc30a2                                        | 1427339_at   | -1.5   | -1.4   |
| Slc7a8                                         | 1417929_at   | -1.6   | -1.6   |
| Slc16a10                                       | 1436368_at   | -1.7   | -1.4   |
| Slc5a9                                         | 1439494_at   | -1.7   | -1.7   |
| Slc13a1                                        | 1430804_at   | -2.1   | -2.0   |
|                                                |              |        |        |
| Cyp4a10 /// BC013476                           | 1424853_s_at | 1447.2 | 120.2  |
| Cyp2c65                                        | 1429994_s_at | 2.6    | 2.3    |
| Cyp4f16 /// LOC545195                          | 1430172_a_at | 1.9    | 1.5    |
| Cyp4f16                                        | 1417277_at   | 1.9    | 1.5    |
| Cyp2d22                                        | 1419039_at   | 1.7    | 1.5    |
|                                                |              |        |        |
| Akr1b8                                         | 1448894_at   | 13.4   | 3.2    |
| Gstm4                                          | 1424835_at   | 2.0    | 1.8    |
| Ephx1                                          | 1422438_at   | 1.7    | 1.6    |
| Ephx2                                          | 1448499_a_at | 1.5    | 1.4    |
| Ugt1a2 /// Ugt1a6a /// Ugt1a10 /// Ugt1a7c /// |              |        |        |
| Ugt1a5 /// Ugt1a9 /// Ugt1a6b /// Ugt1a1       | 1426261_s_at | 1.5    | 1.3    |
| Ugt1a2 /// Ugt1a6a /// Ugt1a10 /// Ugt1a7c /// |              |        |        |
| Ugt1a5 /// Ugt1a9 /// Ugt1a6b /// Ugt1a1       | 1424783_a_at | 1.5    | 1.2    |
| Mgst1                                          | 1415897_a_at | 1.4    | 1.3    |
| Gstk1                                          | 1452823_at   | 1.3    | 1.3    |
|                                                |              |        |        |
| Abca1                                          | 1450392_at   | 12.1   | 3.2    |
| Abca1                                          | 1421839_at   | 10.9   | 2.9    |
| Abca1                                          | 1421840_at   | 5.1    | 2.1    |
| Abcd3                                          | 1416679_at   | 2.8    | 1.7    |

## Overlap WY14643 and DHA

| Gene symbol                                    | Probe set ID | FC WY  | FC DHA |
|------------------------------------------------|--------------|--------|--------|
| Slc22a5                                        | 1421848_at   | 7.7    | 4.2    |
| Slc22a5                                        | 1440536_at   | 8.3    | 3.1    |
| Slc22a5                                        | 1450395_at   | 4.7    | 2.7    |
| Slc25a20                                       | 1423109_s_at | 6.8    | 2.4    |
| Slc25a20                                       | 1423108_at   | 5.6    | 2.4    |
| Slc16a13                                       | 1453056_at   | 10.7   | 1.8    |
| Slc27a4                                        | 1424441_at   | 1.7    | 1.4    |
| Slc4a4                                         | 1434096_at   | -1.3   | -1.3   |
| Slc6a4                                         | 1417150_at   | -1.4   | -1.3   |
| Slc44a4                                        | 1416596_at   | -1.3   | -1.5   |
| Slc30a2                                        | 1427339_at   | -1.5   | -1.6   |
| Slc17a5                                        | 1429116_at   | -1.4   | -1.7   |
| Slc16a10                                       | 1436368_at   | -1.7   | -1.8   |
| Slc5a9                                         | 1426634_at   | -1.5   | -1.8   |
| Slc7a8                                         | 1417929_at   | -1.6   | -2.0   |
| Slc5a9                                         | 1439494_at   | -1.7   | -2.0   |
| Slc13a2                                        | 1418857_at   | -2.1   | -2.2   |
| Cyp4a10 /// BC013476                           | 1424853_s_at | 1447.2 | 160.3  |
| Cyp2c65                                        | 1429994_s_at | 2.6    | 2.5    |
| Cyp4f16                                        | 1417277_at   | 1.9    | 1.4    |
| Akr1b8                                         | 1448894_at   | 13.4   | 5.1    |
| Ephx1                                          | 1422438_at   | 1.7    | 1.9    |
| Gstm4                                          | 1424835_at   | 2.0    | 1.8    |
| Gstk1                                          | 1452823_at   | 1.3    | 1.5    |
| Ugt1a2 /// Ugt1a6a /// Ugt1a10 /// Ugt1a7c /// |              |        |        |
| Ugt1a5 /// Ugt1a9 /// Ugt1a6b /// Ugt1a1       | 1424783_a_at | 1.5    | 1.3    |
| Ugt1a2 /// Ugt1a6a /// Ugt1a10 /// Ugt1a7c /// |              |        |        |
| Ugt1a5 /// Ugt1a9 /// Ugt1a6b /// Ugt1a1       | 1426261_s_at | 1.5    | 1.3    |
| Mgst1                                          | 1415897_a_at | 1.4    | 1.2    |
| Abcd3                                          | 1416679_at   | 2.8    | 1.8    |
| Abcg2                                          | 1422906_at   | 1.9    | 1.3    |

## Overlap EPA and DHA

| Gene symbol                                    | Probe set ID | FC EPA | FC DHA |
|------------------------------------------------|--------------|--------|--------|
| Slc22a5                                        | 1421848_at   | 3.2    | 4.2    |
| Slc22a5                                        | 1440536_at   | 2.3    | 3.1    |
| Slc22a5                                        | 1450395_at   | 2      | 2.7    |
| Slc16a13                                       | 1453056_at   | 1.5    | 1.8    |
| Slc20a2                                        | 1457302_at   | 1.4    | 1.4    |
| Slc27a4                                        | 1424441_at   | 1.5    | 1.4    |
| Slc6a4                                         | 1417150_at   | -1.2   | -1.3   |
| Slc4a4                                         | 1426432_a_at | -1.5   | -1.5   |
| Slc30a2                                        | 1427339_at   | -1.4   | -1.6   |
| Slc16a10                                       | 1436368_at   | -1.4   | -1.8   |
| Slc36a1                                        | 1428793_at   | -1.6   | -1.8   |
| Slc5a9                                         | 1426634_at   | -1.4   | -1.8   |
| Slc7a8                                         | 1417929_at   | -1.6   | -2     |
| Slc5a9                                         | 1439494_at   | -1.7   | -2     |
| Slc34a2                                        | 1416854_at   | -2.7   | -5     |
| Cyp4a10 /// BC013476                           | 1424853_s_at | 120.2  | 160.3  |
| Cyp2c65                                        | 1429994_s_at | 2.3    | 2.5    |
| Cyp4f16                                        | 1417277_at   | 1.5    | 1.4    |
| Akr1b8                                         | 1448894_at   | 3.2    | 5.1    |
| Hs3st1                                         | 1423450_a_at | 2.1    | 2.7    |
| Gstm3                                          | 1427473_at   | 2.4    | 2.6    |
| Gstm3                                          | 1427474_s_at | 2      | 2.1    |
| Ephx1                                          | 1422438_at   | 1.6    | 1.9    |
| Gstm4                                          | 1424835_at   | 1.8    | 1.8    |
| Gstk1                                          | 1452823_at   | 1.3    | 1.5    |
| Gsta1 /// Gsta2                                | 1421041_s_at | 1.2    | 1.3    |
| Ugt1a2 /// Ugt1a6a /// Ugt1a10 /// Ugt1a7c /// |              |        |        |
| Ugt1a5 /// Ugt1a9 /// Ugt1a6b /// Ugt1a1       | 1424783_a_at | 1.2    | 1.3    |
| Ugt1a2 /// Ugt1a6a /// Ugt1a10 /// Ugt1a7c /// |              |        |        |
| Ugt1a5 /// Ugt1a9 /// Ugt1a6b /// Ugt1a1       | 1426261_s_at | 1.3    | 1.3    |
| Mgst1                                          | 1415897_a_at | 1.3    | 1.2    |
| Abcd3                                          | 1416679_at   | 1.7    | 1.8    |

## Overlap WY, EPA and DHA

| Gene symbol                                                                                | Probe set ID | FC WY  | FC EPA | FC DHA |
|--------------------------------------------------------------------------------------------|--------------|--------|--------|--------|
| Slc16a13                                                                                   | 1453056_at   | 10.7   | 1.5    | 1.8    |
| Slc22a5                                                                                    | 1440536_at   | 8.3    | 2.3    | 3.1    |
| Slc22a5                                                                                    | 1421848_at   | 7.7    | 3.2    | 4.2    |
| Slc25a20                                                                                   | 1423109_s_at | 6.8    | 2.6    | 2.4    |
| Slc25a20                                                                                   | 1423108_at   | 5.6    | 2.3    | 2.4    |
| Slc22a5                                                                                    | 1450395_at   | 4.7    | 2.0    | 2.7    |
| Slc27a4                                                                                    | 1424441_at   | 1.7    | 1.5    | 1.4    |
| Slc6a4                                                                                     | 1417150_at   | -1.4   | -1.2   | -1.3   |
| Slc5a9                                                                                     | 1426634_at   | -1.5   | -1.4   | -1.8   |
| Slc30a2                                                                                    | 1427339_at   | -1.5   | -1.4   | -1.6   |
| Slc7a8                                                                                     | 1417929_at   | -1.6   | -1.6   | -2.0   |
| Slc16a10                                                                                   | 1436368_at   | -1.7   | -1.4   | -1.8   |
| Slc5a9                                                                                     | 1439494_at   | -1.7   | -1.7   | -2.0   |
| Cyp4a10 /// BC013476                                                                       | 1424853_s_at | 1447.2 | 120.2  | 160.3  |
| Cyp2c65                                                                                    | 1429994_s_at | 2.6    | 2.3    | 2.5    |
| Cyp4f16                                                                                    | 1417277_at   | 1.9    | 1.5    | 1.4    |
| Akr1b8                                                                                     | 1448894_at   | 13.4   | 3.2    | 5.1    |
| Gstm4                                                                                      | 1424835_at   | 2.0    | 1.8    | 1.8    |
| Ephx1                                                                                      | 1422438_at   | 1.7    | 1.6    | 1.9    |
| Ugt1a2 /// Ugt1a6a /// Ugt1a10 /// Ugt1a7c<br>/// Ugt1a5 /// Ugt1a9 /// Ugt1a6b /// Ugt1a1 | 1426261_s_at | 1.5    | 1.3    | 1.3    |
| Ugt1a2 /// Ugt1a6a /// Ugt1a10 /// Ugt1a7c<br>/// Ugt1a5 /// Ugt1a9 /// Ugt1a6b /// Ugt1a1 | 1424783_a_at | 1.5    | 1.2    | 1.3    |
| Mgst1                                                                                      | 1415897_a_at | 1.4    | 1.3    | 1.2    |
| Gstk1                                                                                      | 1452823_at   | 1.3    | 1.3    | 1.5    |
| Abcd3                                                                                      | 1416679_at   | 2.8    | 1.7    | 1.8    |

Presented are the overlap of PPAR $\alpha$ -dependently regulated barrier genes after acute treatment with the agonists for the combinations WY14643 and EPA; WY14643 and DHA; EPA and DHA; and WY14643. EPA and DHA. . Listed are the gene symbols, corresponding Affymetrix probeset identifiers, and the fold changes (FC) upon treatment with each agonist(s).
