# Supplementary material for: PPARalpha-mediated effects of dietary lipids on intestinal barrier gene expression
Source: PubMed Central journal article supplement (PMC2408604; doi:10.1186/1471-2164-9-231), 2008-05-19
Supplement: 1471-2164-9-231-S7.pdf [file 1471-2164-9-231-S7.pdf]

**Additional Table 7: Confirmation of microarray results, part 2**

| <b>Gene symbol</b> | <b>WY14643</b> |                     | <b>DHA</b>     |                     |
|--------------------|----------------|---------------------|----------------|---------------------|
|                    | <b>FC (MA)</b> | <b>FC (qPCR)</b>    | <b>FC (MA)</b> | <b>FC (qPCR)</b>    |
| <i>Slc22a5</i>     | <b>8.3*</b>    | <b>7.4 (2.2)*</b>   | <b>4.2*</b>    | <b>2.4 (0.5)*</b>   |
| <i>Slc16a13</i>    | <b>10.7*</b>   | <b>6.0 (2.9)*</b>   | <b>1.8*</b>    | <b>1.5 (0.2)*</b>   |
| <i>Abca1</i>       | <b>12.1 *</b>  | <b>5.5 (1.9)*</b>   | <b>Nc</b>      | <b>1.3 (0.3)</b>    |
| <i>Akr1b8</i>      | <b>13.4*</b>   | <b>6.0 (1.6)*</b>   | <b>5.1*</b>    | <b>3.1 (1.6)*</b>   |
| <i>Cyp4a10</i>     | <b>1447*</b>   | <b>319 (120.5)*</b> | <b>160*</b>    | <b>44.9 (13.6)*</b> |
| <i>Abcd3</i>       | <b>2.8*</b>    | <b>4.7 (1.4)*</b>   | <b>1.8*</b>    | <b>2.3 (0.2)*</b>   |

Microarray results were confirmed with qRT-PCR. FC = Fold change, MA = microarray, qPCR = quantitative PCR, nc = not changed. For the qPCR analysis: mRNA levels were standardized to cyclophilin; expression in the PPAR $\alpha$ -null mice was arbitrarily set to 1. Significance was determined by a Bayesian t-test (array data) or unpaired student's *t*-test (qPCR data), \*= p-value <0.05. Data are means  $\pm$  standard error (n=4-5).
